# Supplementary material for: Synthesis of mesoporous aluminosilicate with zeolitic characteristics using vapor phase transport
Source: Royal Society of Chemistry journal article supplement (doi:10.1039/b500075k), 2005-01-01
Supplement: b500075k.pdf [file b500075k.pdf]

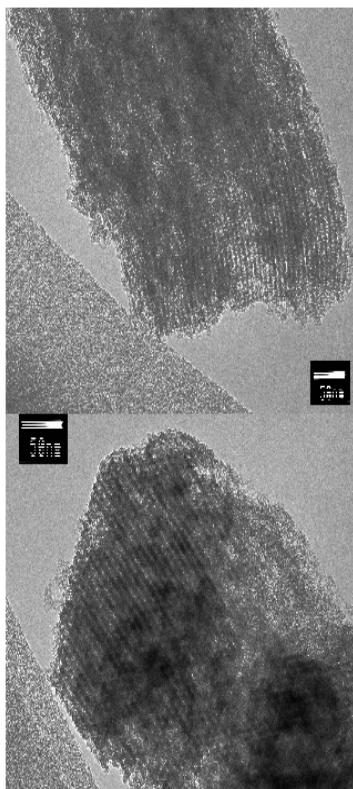

**Supplementary Information 1.** TEM images of ZMM-1.

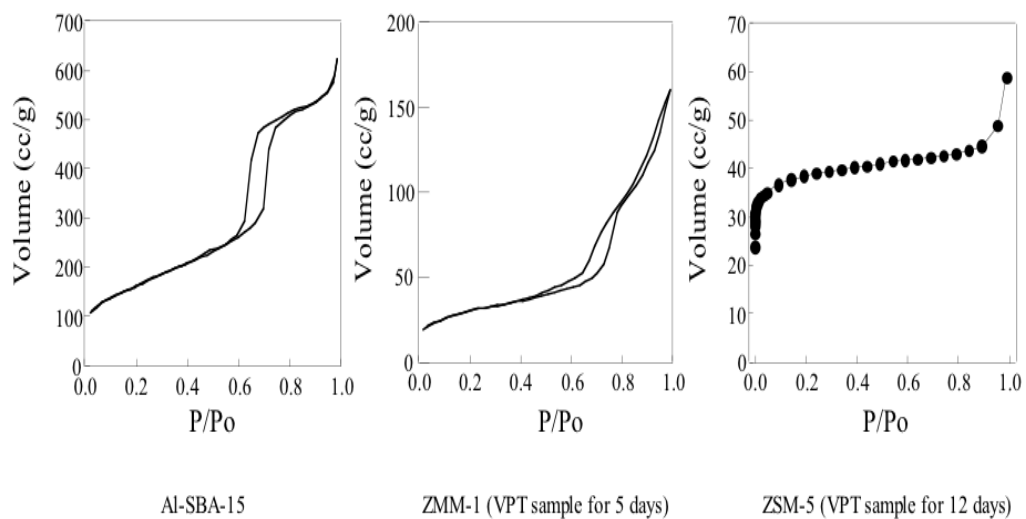

**Supplementary Information 2.** Nitrogen adsorption isotherms of Al-SBA-15, ZMM-1, and ZSM-5.
